# Supplementary material for: Quantification of ortholog losses in insects and vertebrates
Source: PubMed Central journal article supplement (PMC2258195; doi:10.1186/gb-2007-8-11-r242), 2007-11-16
Supplement: gb-2007-8-11-r242-S1.pdf [file gb-2007-8-11-r242-S1.pdf]

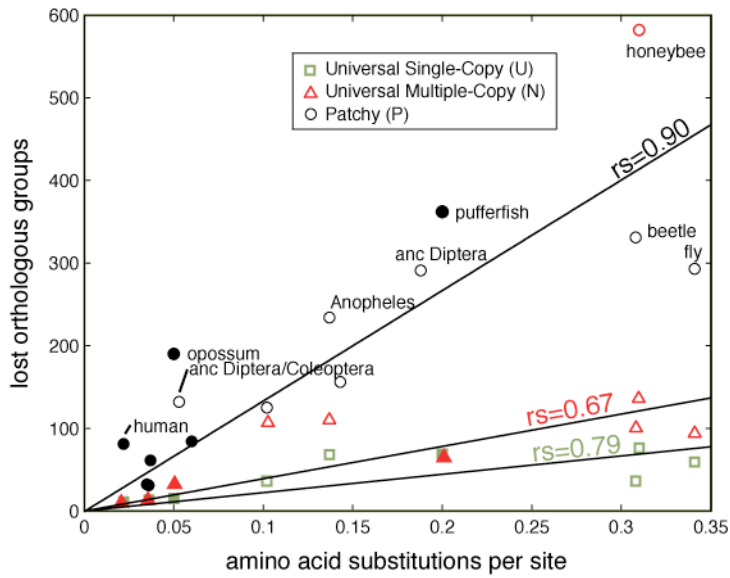

Additional data file 1. The number of lost orthologous groups correlates with the rate of amino acid substitutions.

The number of ancient orthologous groups (U, N, P) extinctions is plotted versus the branch length of the Maximum-Likelihood phylogenetic tree (see Figure 1). Filled symbols denote vertebrates and open symbols denote insects. Some selected losses of patchy orthologs are labelled. Abbreviations: anc – ancestral.
