# Supplementary material for: Quantification of ortholog losses in insects and vertebrates
Source: PubMed Central journal article supplement (PMC2258195; doi:10.1186/gb-2007-8-11-r242), 2007-11-16
Supplement: gb-2007-8-11-r242-S2.pdf [file gb-2007-8-11-r242-S2.pdf]

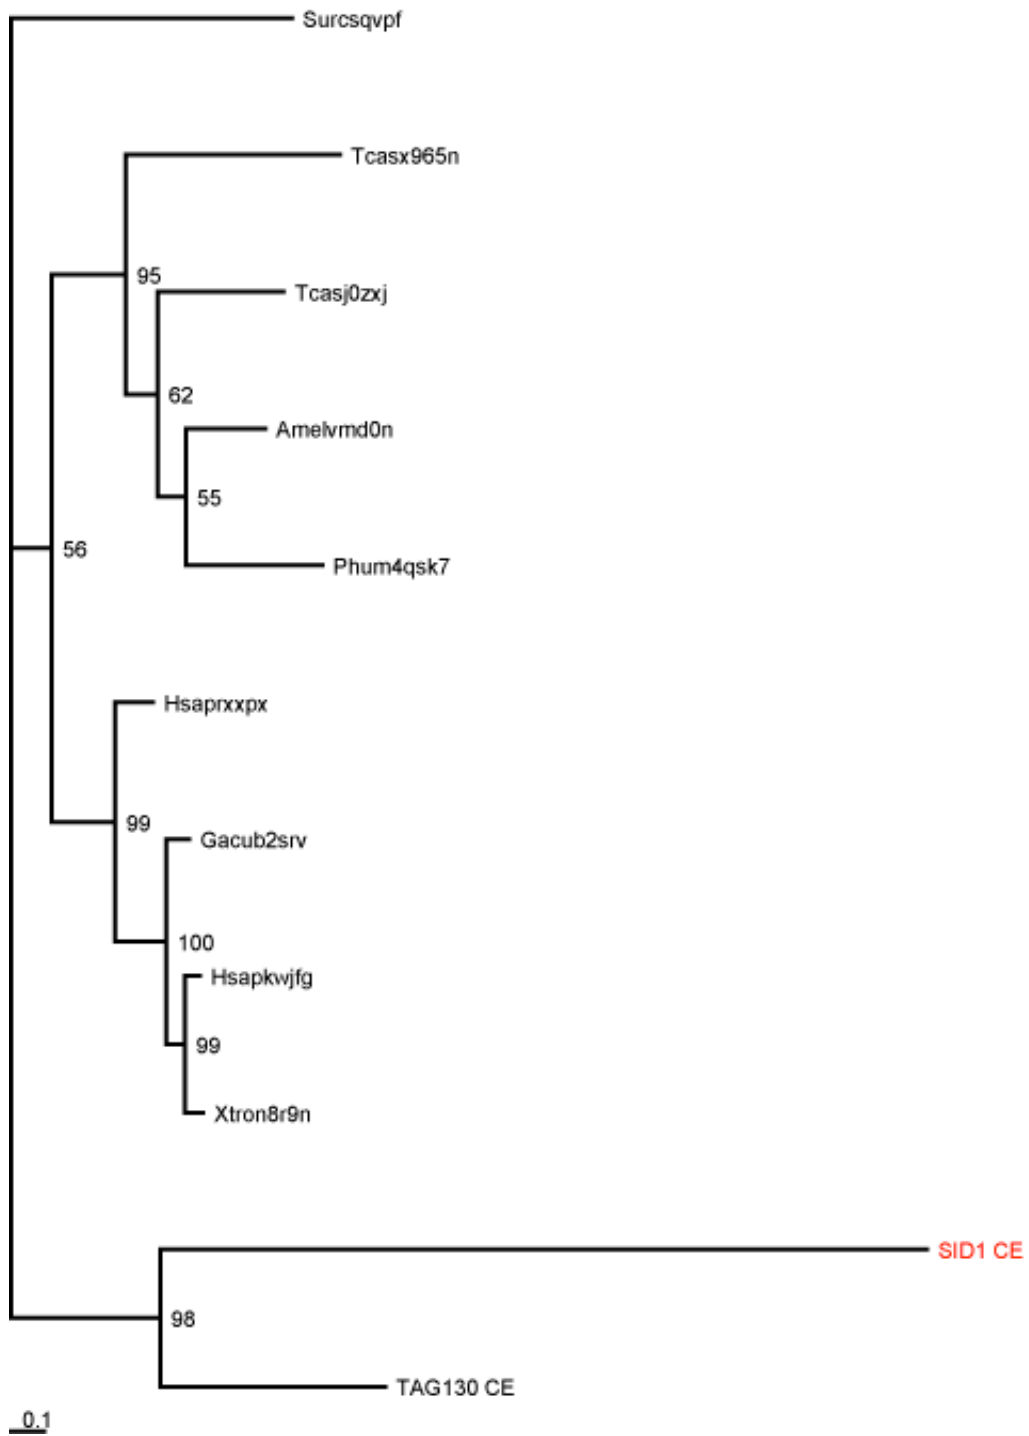

Additional data file 2. Maximum-likelihood phylogenetic analysis of SID-1 proteins. Branching confidence was estimated based on 100 bootstraps.
