# Supplementary material for: Quantification of ortholog losses in insects and vertebrates
Source: PubMed Central journal article supplement (PMC2258195; doi:10.1186/gb-2007-8-11-r242), 2007-11-16
Supplement: gb-2007-8-11-r242-S4.pdf [file gb-2007-8-11-r242-S4.pdf]

Additional data file 4. GO terms which are under- or overrepresented in insect-specific orthologous groups lost in all Dipterans. Chi-Square Test without multiple testing correction. Significance levels are 0.05 (\*) and <0.01 (\*\*)

| Level                      | GO id              | GO description                  | lost | present | lost % | present % | under/over-represented | Significance |
|----------------------------|--------------------|---------------------------------|------|---------|--------|-----------|------------------------|--------------|
| <b>Molecular Function:</b> |                    |                                 |      |         |        |           |                        |              |
|                            | catalytic activity |                                 |      |         |        |           |                        |              |
|                            | 3GO:0016491        | oxidoreductase activity         | 16   | 449     | 11.9   | 4.2       | over                   | **           |
| <b>Biological Process:</b> |                    |                                 |      |         |        |           |                        |              |
|                            | metabolism         |                                 |      |         |        |           |                        |              |
|                            | 4GO:0009058        | biosynthesis                    | 1    | 458     | 0.7    | 4.2       | under                  | *            |
|                            | 4GO:0044238        | primary metabolism              | 21   | 2592    | 15.7   | 24        | under                  | *            |
|                            | 5GO:0006139        | nucleobase, nucleoside, nucleot | 4    | 848     | 3      | 7.9       | under                  | *            |
| <b>Cellular Component:</b> |                    |                                 |      |         |        |           |                        |              |
|                            | intracellular      |                                 |      |         |        |           |                        |              |
|                            | 4GO:0005622        | intracellular                   | 11   | 1619    | 8.2    | 15        | under                  | *            |
