# Supplementary material for: Quantification of ortholog losses in insects and vertebrates
Source: PubMed Central journal article supplement (PMC2258195; doi:10.1186/gb-2007-8-11-r242), 2007-11-16
Supplement: gb-2007-8-11-r242-S5.pdf [file gb-2007-8-11-r242-S5.pdf]

Additional data file 5. Coelimination of functionally linked genes in the Diptera and Drosophila lineages.

| Protein function   | Human      | Representative | Comments                                                                                                                      | ensembl id                                                                                |                 |
|--------------------|------------|----------------|-------------------------------------------------------------------------------------------------------------------------------|-------------------------------------------------------------------------------------------|-----------------|
| Ubiquitin cycle    | BRCA1      |                | BREAST CANCER TYPE 1 SUSCEPTIBILITY HOMOLOG                                                                                   | ENSG00000012048                                                                           |                 |
|                    | BRCC3      |                | BRCA1/BRCA2 CONTAINING COMPLEX SUBUNIT 3                                                                                      | ENSG00000185515                                                                           |                 |
|                    | UHRF1      |                | UBIQUITIN PHD AND RING FINGER DOMAIN CONTAINING 2 EC_6.3.2.- UBIQUITIN CONTAINING PHD AND RING FINGER DOMAIN                  | ENSG00000034063                                                                           |                 |
|                    | UBE2T      |                | UBIQUITIN CONJUGATING ENZYME EC_6.3.2.19 UBIQUITIN LIGASE UBIQUITIN CARRIER                                                   | ENSG00000077152                                                                           |                 |
|                    | USP48      |                | UBIQUITIN CARBOXYL TERMINAL HYDROLASE 48 EC_3.1.2.15 UBIQUITIN THIOESTERASE 48 UBIQUITIN SPECIFIC CARBOXYL TERMINAL HYDROLASE | ENSG00000090686                                                                           |                 |
|                    | MAP1LC3A   |                | MICROTUBULE ASSOCIATED PROTEINS 1A/1B LIGHT CHAIN 3B MICROTUBULE ASSOCIATED 1 LIGHT CHAIN                                     | ENSG00000101460                                                                           |                 |
|                    | RNF8       |                | UBIQUITIN LIGASE RNF8 EC_6.3.2.- RING FINGER 8                                                                                | ENSG00000112130                                                                           |                 |
|                    | SUMO1      |                | SMALL UBIQUITIN RELATED MODIFIER PRECURSOR SUMO UBIQUITIN SMT3 HOMOLOG                                                        | ENSG00000116030                                                                           |                 |
|                    | USPL1      |                | AMBIGUOUS                                                                                                                     | ENSG00000132952                                                                           |                 |
|                    | FBXO6      |                | F BOX ONLY                                                                                                                    | ENSG00000116663                                                                           |                 |
|                    | FBXO21     |                | F BOX ONLY 21                                                                                                                 | ENSG00000135108                                                                           |                 |
|                    | RFWD2      |                | RING FINGER AND WD REPEAT DOMAIN 2 EC_6.3.2.- UBIQUITIN LIGASE COP1 CONSTITUTIVE PHOTOMORPHOGENE                              | ENSG00000143207                                                                           |                 |
|                    | BRE        |                | BRE BRAIN AND REPRODUCTIVE ORGAN EXPRESSED                                                                                    | ENSG00000158019                                                                           |                 |
|                    | FBXO22     |                | F BOX ONLY 22                                                                                                                 | ENSG00000167196                                                                           |                 |
|                    | UBE2J1     |                | UBIQUITIN CONJUGATING ENZYME E2 6 EC_6.3.2.19 UBIQUITIN LIGASE UBC6 UBIQUITIN CARRIER UBC6                                    | ENSG00000198833                                                                           |                 |
|                    | RNF19      |                | RING FINGER 19                                                                                                                | ENSG00000034677                                                                           |                 |
|                    | PCNP       |                | PEST PROTEOLYTIC SIGNAL CONTAINING NUCLEAR PEST CONTAINING NUCLEAR PCNP                                                       | ENSG00000081154                                                                           |                 |
|                    | UFM1       |                | UBIQUITIN FOLD MODIFIER 1 PRECURSOR                                                                                           | ENSG00000120686                                                                           |                 |
|                    | RBCK1      |                | RANBP TYPE AND C3HC4 TYPE ZINC FINGER CONTAINING 1 UBIQUITIN CONJUGATING ENZYME 7 INTERACTING                                 | ENSG00000125826                                                                           |                 |
|                    | USP3       |                | UBIQUITIN CARBOXYL TERMINAL HYDROLASE EC_3.1.2.15 UBIQUITIN THIOESTERASE UBIQUITIN SPECIFIC CARBOXYL TERMINAL HYDROLASE       | ENSG00000140455                                                                           |                 |
|                    | ANAPC11    |                | RING BOX 1                                                                                                                    | ENSG00000141552                                                                           |                 |
|                    | LRSAM1     |                | UBIQUITIN LIGASE LRSAM1 EC_6.3.2.- LEUCINE RICH REPEAT AND STERILE ALPHA MOTIF CONTAINING 1                                   | ENSG00000148356                                                                           |                 |
|                    | OTUD7B     |                | OTU DOMAIN CONTAINING EC 3 ZINC FINGER CEZANNE                                                                                | ENSG00000163113                                                                           |                 |
|                    | DNA damage | COX19          |                                                                                                                               | CYTOCHROME C OXIDASE ASSEMBLY COX19                                                       | ENSG00000189201 |
|                    |            | BRE            |                                                                                                                               | BRE BRAIN AND REPRODUCTIVE ORGAN EXPRESSED                                                | ENSG00000158019 |
|                    |            |                |                                                                                                                               | AMBIGUOUS                                                                                 | ENSG00000162864 |
|                    |            | BRCA1          |                                                                                                                               | BREAST CANCER TYPE 1 SUSCEPTIBILITY HOMOLOG                                               | ENSG00000012048 |
|                    |            | BRCC3          |                                                                                                                               | BRCA1/BRCA2 CONTAINING COMPLEX SUBUNIT 3                                                  | ENSG00000185515 |
|                    |            | BRIP1          |                                                                                                                               | FANCONI ANEMIA GROUP J EC_3.6.1.- ATP DEPENDENT RNA HELICASE BRIP1 FACJ BRCA1 INTERACTING | ENSG00000136492 |
|                    |            | C14orf105      |                                                                                                                               | UNCHARACTERIZED                                                                           | ENSG00000100557 |
|                    |            | SIRT1          |                                                                                                                               | NAD DEPENDENT DEACETYLASE EC_3.5.1.-                                                      | ENSG00000096717 |
|                    |            | BAG2           |                                                                                                                               | BAG FAMILY MOLECULAR CHAPERONE REGULATOR 2 BCL2 ASSOCIATED ATHANOGENE 2 BAG 2             | ENSG00000112208 |
| CCDC53             |            |                | COILED COIL DOMAIN CONTAINING 53                                                                                              | ENSG00000120860                                                                           |                 |
| C12orf45           |            |                | AMBIGUOUS                                                                                                                     | ENSG00000151131                                                                           |                 |
| BHLHB5             |            |                | OLIGODENDROCYTE TRANSCRIPTION FACTOR                                                                                          | ENSG00000180828                                                                           |                 |
| PLEKHF2            |            |                | PLECKSTRIN HOMOLOGY DOMAIN CONTAINING FAMILY F MEMBER PH DOMAIN CONTAINING FAMILY F MEMBER                                    | ENSG00000175895                                                                           |                 |
| MED28              |            |                | MEDIATOR OF RNA POLYMERASE II TRANSCRIPTION SUBUNIT 28 MEDIATOR COMPLEX SUBUNIT 28                                            | ENSG00000118579                                                                           |                 |
| STIM2              |            |                | STROMAL INTERACTION MOLECULE PRECURSOR                                                                                        | ENSG00000109689                                                                           |                 |
| SFRS14             |            |                | SPLICING FACTOR ARGININE/SERINE RICH 14 ARGININE/SERINE RICH SPLICING FACTOR 14                                               | ENSG00000064607                                                                           |                 |
| SULT2B1            |            |                | SULFOTRANSFERASE                                                                                                              | ENSG00000088002                                                                           |                 |
| FUT2               |            |                | GALACTOSIDE 2 ALPHA L FUCOSYLTRANSFERASE 1 EC_2.4.1.69 GDP L FUCOSE: BETA D GALACTOSIDE 2 ALPHA L FUCOSYLTRANSFERASE          | ENSG00000176920                                                                           |                 |
|                    |            |                | AMBIGUOUS                                                                                                                     | ENSG00000145835                                                                           |                 |
| Actin cytoskeleton |            | FGD1           |                                                                                                                               | FYVE RHOGEF AND PH DOMAIN CONTAINING ZINC FINGER FYVE DOMAIN CONTAINING                   | ENSG00000102302 |
|                    |            | CORO2B         |                                                                                                                               | CORONIN                                                                                   | ENSG00000103647 |
|                    |            | KPTN           |                                                                                                                               | KAPTIN                                                                                    | ENSG00000118162 |
|                    |            | SDCBP          |                                                                                                                               | SYNTENIN SYNDECAN BINDING                                                                 | ENSG00000137575 |
|                    |            | KALRN          |                                                                                                                               | HUNTINGTIN ASSOCIATED INTERACTING PROTEIN DUO                                             | ENSG00000160145 |
|                    |            | DAPK1          |                                                                                                                               | MYOSIN LIGHT CHAIN KINASE MUSCLE EC_2.7.1.18                                              | ENSG00000196730 |

| Regulation of transcription | regulation                                                                                |                 |
|-----------------------------|-------------------------------------------------------------------------------------------|-----------------|
| BZRAP1                      | RIM BINDING RIM                                                                           | ENSG00000005379 |
|                             | JMJC DOMAIN CONTAINING HISTONE DEMETHYLATION EC_1.14.11.-                                 | ENSG00000006459 |
| LGALS14                     | LECTIN                                                                                    | ENSG00000006659 |
| PGLYRP1                     | PEPTIDOGLYCAN RECOGNITION                                                                 | ENSG00000008438 |
| BRCA1                       | BREAST CANCER TYPE 1 SUSCEPTIBILITY HOMOLOG                                               | ENSG00000012048 |
| RNF14                       | RING FINGER 14 ANDROGEN RECEPTOR ASSOCIATED 54 TRIAD2                                     | ENSG00000013561 |
| UHRF1                       | UBIQUITIN PHD AND RING FINGER DOMAIN CONTAINING 2 EC_6.3.2.- UBIQUITIN CONTAINING PHD AN  | ENSG00000034063 |
| EPN3                        | EPSIN                                                                                     | ENSG00000049283 |
| SFRS14                      | SPlicing FACTOR ARGININE/SERINE RICH 14 ARGININE/SERINE RICH SPlicing FACTOR 14           | ENSG00000064607 |
| ATXN3                       | ATAXIN 3 EC_3.4.22.- MACHADO JOSEPH DISEASE                                               | ENSG00000066427 |
| KIF2A                       | KINESIN                                                                                   | ENSG00000068796 |
| CECR5                       | CAT EYE SYNDROME CRITICAL REGION 5 PRECURSOR                                              | ENSG00000069998 |
| C14orf101                   | UNCHARACTERIZED                                                                           | ENSG00000070269 |
| FOSL2                       | PROTO ONCOGENE C FOS CELLULAR ONCOGENE FOS                                                | ENSG00000075426 |
| ARHGAP15                    | GTPASE ACTIVATING                                                                         | ENSG00000075884 |
| FGF20                       | FIBROBLAST GROWTH FACTOR FGF                                                              | ENSG00000078579 |
| CHERP                       | AMBIGUOUS                                                                                 | ENSG00000085872 |
| SEPHS1                      | SELENIDE WATER DIKINASE EC_2.7.9.3 SELENOPHOSPHATE SYNTHETASE SELENIUM DONOR              | ENSG00000086475 |
| NID2                        | NIDOGEN                                                                                   | ENSG00000087303 |
| SULT2B1                     | SULFOTRANSFERASE                                                                          | ENSG00000088002 |
| VIL2                        | EZRIN 2                                                                                   | ENSG00000092820 |
| NUP188                      | UNKNOWN                                                                                   | ENSG00000095319 |
| SIRT1                       | NAD DEPENDENT DEACETYLASE EC_3.5.1.-                                                      | ENSG00000096717 |
| NDUF87                      | NADH DEHYDROGENASE [UBIQUINONE] 1 BETA SUBCOMPLEX SUBUNIT 7 EC_1.6.5.3 EC_1.6.99.- 3      | ENSG00000099795 |
| GPSN2                       | SYNAPTIC GLYCOPROTEIN SC2                                                                 | ENSG00000099797 |
| GADD45B                     | GROWTH ARREST AND DNA DAMAGE INDUCIBLE GADD45                                             | ENSG00000099860 |
| C14orf105                   | UNCHARACTERIZED                                                                           | ENSG00000100557 |
| ADNP                        | ACTIVITY DEPENDENT NEUROPROTECTOR ACTIVITY DEPENDENT NEUROPROTECTIVE                      | ENSG00000101126 |
| HRH3                        | MUSCARINIC ACETYLCHOLINE RECEPTOR                                                         | ENSG00000101180 |
| BPI                         | LIPOPOLYSACCHARIDE BINDING PRECURSOR LBP                                                  | ENSG00000101425 |
| ARHGEF7                     | RHO GUANINE NUCLEOTIDE EXCHANGE FACTOR 6 RAC/CDC42 GUANINE NUCLEOTIDE EXCHANGE FA         | ENSG00000102606 |
| NUP93                       | NUCLEAR PORE COMPLEX NUP93 NUCLEOPORIN NUP93.93 KDA NUCLEOPORIN                           | ENSG00000102900 |
| GSPT1                       | EUKARYOTIC PEPTIDE CHAIN RELEASE FACTOR GTP BINDING SUBUNIT ERF2 TRANSLATION RELEASE FAC  | ENSG00000103342 |
| BFAR                        | BIFUNCTIONAL APOPTOSIS REGULATOR                                                          | ENSG00000103429 |
| NGK7                        | NGK7 NATURAL KILLER CELL 7                                                                | ENSG00000105374 |
| KIAA0241                    | AMBIGUOUS                                                                                 | ENSG00000105778 |
| SPIN                        | SPINDLIN                                                                                  | ENSG00000106723 |
| LHX6                        | LIM/HOMEBOX                                                                               | ENSG00000106852 |
| PLEKHA1                     | PLECKSTRIN HOMOLOGY DOMAIN CONTAINING FAMILY A MEMBER 1 TANDEM PH DOMAIN CONTAINING       | ENSG00000107679 |
| TCF2                        | HEPATOCYTE NUCLEAR FACTOR 1 HNF                                                           | ENSG00000108753 |
| PMP22                       | EPITHELIAL MEMBRANE EMP                                                                   | ENSG00000109099 |
| STIM2                       | STROMAL INTERACTION MOLECULE PRECURSOR                                                    | ENSG00000109689 |
| PPARGC1A                    | PEROXISOME PROLIFERATOR ACTIVATED RECEPTOR GAMMA COACTIVATOR 1 ALPHA PPAR GAMMA CO        | ENSG00000109819 |
| ELP4                        | AMBIGUOUS                                                                                 | ENSG00000109911 |
| CEP164                      | UNKNOWN                                                                                   | ENSG00000110274 |
| ART4                        | ECTO ADP RIBOSYLTRANSFERASE PRECURSOR EC_2.4.2.31 NAD P + ARGININE ADP RIBOSYLTRANSFERASE | ENSG00000111339 |
| MGP                         | MATRIX GLA PRECURSOR MGP                                                                  | ENSG00000111341 |
| C6orf105                    | UNCHARACTERIZED                                                                           | ENSG00000111863 |
| MAN1A1                      | MANNOSYL OLIGOSACCHARIDE 1 2 ALPHA MANNOSIDASE EC_3.2.1.113 PROCESSING ALPHA 1 2 MANN     | ENSG00000111885 |
| BAG2                        | BAG FAMILY MOLECULAR CHAPERONE REGULATOR 2 BCL2 ASSOCIATED ATHANOGENE 2 BAG 2             | ENSG00000112208 |
| PRDM13                      | PR DOMAIN ZINC FINGER 13 PR DOMAIN CONTAINING 13                                          | ENSG00000112238 |
| EIF1B                       | EUKARYOTIC TRANSLATION INITIATION FACTOR TRANSLATION FACTOR SUI1 HOMOLOG                  | ENSG00000114784 |
| HSPE1                       | 10 KDA HEAT SHOCK PROTEIN MITOCHONDRIAL HSP10.10 KDA CHAPERONIN                           | ENSG00000115541 |
| SMYD1                       | SET AND MYND DOMAIN CONTAINING 3 EC_2.1.1.43 ZINC FINGER MYND DOMAIN CONTAINING 1         | ENSG00000115593 |
| SUMO1 / SUMO1P3             | SMALL UBIQUITIN RELATED MODIFIER PRECURSOR SUMO UBIQUITIN SMT3 HOMOLOG                    | ENSG00000116030 |
| CD46                        | MEMBRANE COFACTOR PRECURSOR CD46 ANTIGEN                                                  | ENSG00000117335 |
| MED28                       | MEDIATOR OF RNA POLYMERASE II TRANSCRIPTION SUBUNIT 28 MEDIATOR COMPLEX SUBUNIT 28        | ENSG00000118579 |
| MSX2                        | HOMEOBOX MSX 1 MSH HOMEOBOX 1                                                             | ENSG00000120149 |
| EXOSC8                      | EXOSOME COMPLEX EXONUCLEASE RRP43 EC_3.1.13.- RIBOSOMAL RNA PROCESSING 43 EXOSOME COMPEN  | ENSG00000120699 |
| CDC53                       | COILED COIL DOMAIN CONTAINING 53                                                          | ENSG00000120860 |
| TMEM39B                     | AMBIGUOUS                                                                                 | ENSG00000121775 |
| PLG                         | PLASMINOGEN EC_3.4.21.7 [CONTAINS: PLASMIN HEAVY CHAIN A; PLASMIN LIGHT CHAIN B]          | ENSG00000122194 |
| TWIST1                      | TWIST RELATED                                                                             | ENSG00000122691 |
| CSE1L                       | EXPORTIN 2 EXP2 IMPORTIN ALPHA RE EXPORTER CHROMOSOME SEGREGATION 1                       | ENSG00000124207 |
| SIRT5                       | NAD DEPENDENT DEACETYLASE SIRTUIN 5 EC_3.5.1.- SIR2 5                                     | ENSG00000124523 |
| PRMT1                       | ARGININE METHYLTRANSFERASE EC_2.1.1.-                                                     | ENSG00000126457 |
| IL22                        | INTERLEUKIN PRECURSOR IL IL 10 RELATED T CELL DERIVED INDUCIBLE FACTOR IL TIF             | ENSG00000127318 |
| DOCK6                       | DEDICATOR OF CYTOKINESIS                                                                  | ENSG00000130158 |
|                             | EXOCYST COMPLEX COMPONENT 3 EXOCYST COMPLEX COMPONENT SEC6                                | ENSG00000130201 |
| PVRL2                       | POLIOVIRUS RECEPTOR RELATED PRECURSOR HERPES VIRUS ENTRY MEDIATOR NECTIN ANTIGEN          | ENSG00000130202 |
| APOE                        | APOLIPOPROTEIN E APO E                                                                    | ENSG00000130203 |
| TOMM40                      | PROBABLE MITOCHONDRIAL IMPORT RECEPTOR SUBUNIT TOM40 HOMOLOG TRANSLOCASE OF OUTER         | ENSG00000130204 |
| APOC2 APOC4                 | APOLIPOPROTEIN C IV PRECURSOR APO CIV APOC IV                                             | ENSG00000130207 |
| DNMT1                       | DNA CYTOSINE 5 METHYLTRANSFERASE EC_2.1.1.37 DNMT1 DNA METHYLTRANSFERASE DNA MTASE        | ENSG00000130816 |
| ZNF341                      | ZINC FINGER 341                                                                           | ENSG00000131061 |
| C1QL1                       | C1Q RELATED FACTOR PRECURSOR COMPLEMENT COMPONENT 1 Q SUBCOMPONENT 1                      | ENSG00000131094 |
|                             | SWITCH ASSOCIATED 70 SWAP 70                                                              | ENSG00000133789 |
| MICALCL                     | AMBIGUOUS                                                                                 | ENSG00000133808 |
| MICAL2                      | MICAL                                                                                     | ENSG00000133816 |
| RINT1                       | RAD50 INTERACTING 1 RAD50 INTERACTOR 1 RINT 1                                             | ENSG00000135249 |
| C13orf34                    | AMBIGUOUS                                                                                 | ENSG00000136122 |
| RCBTB1                      | RCC1 AND BTB DOMAIN CONTAINING 2 REGULATOR OF CHROMOSOME CONDENSATION AND BTB DOEN        | ENSG00000136144 |
| CIB2                        | CALCIUM AND INTEGRIN BINDING 1 CALMYRIN DNA PKCS INTERACTING KINASE INTERACTING KIP CIBEN | ENSG00000136425 |
| BRIP1                       | FANCONI ANEMIA GROUP J EC_3.6.1.- ATP DEPENDENT RNA HELICASE BRIP1 FACJ BRCA1 INTERACTI   | ENSG00000136492 |
| TFAP2A                      | TRANSCRIPTION FACTOR AP 2 ALPHA AP2 ALPHA ACTIVATING ENHANCER BINDING 2 ALPHA ACTIVA      | ENSG00000137203 |
| TMEM180                     | UNCHARACTERIZED MEMBRANE                                                                  | ENSG00000138111 |
| LBX1                        | TRANSCRIPTION FACTOR LBX1                                                                 | ENSG00000138136 |
| SEPT11                      | SEPTIN                                                                                    | ENSG00000138758 |
| WDR89                       | WD REPEAT                                                                                 | ENSG00000140006 |
| RANBP10                     | RAN BINDING 9 RANBP9 RAN BINDING M RANBPM                                                 | ENSG00000141084 |
| RFX5                        | DNA BINDING RFX5 REGULATORY FACTOR X SUBUNIT 5                                            | ENSG00000143390 |
| VGLL4                       | TRANSCRIPTION COFACTOR VESTIGIAL 4 VGL 4                                                  | ENSG00000144560 |
| EAF1                        | ELL ASSOCIATED FACTOR 2 TESTOSTERONE REGULATED APOPTOSIS INDUCER AND TUMOR SUPPRESSORE    | ENSG00000144597 |

|              |                                                                                          |                 |
|--------------|------------------------------------------------------------------------------------------|-----------------|
| LHFPL2       | LIPOMA HMGIC FUSION PARTNER 2                                                            | ENSG00000145685 |
| IRAK1BP1     | AMBIGUOUS                                                                                | ENSG00000145835 |
| ATP6V1B2     | CDNA PRODUCT:ACTA BINDING 3                                                              | ENSG00000146243 |
| UHRF2        | VACUOLAR ATP SYNTHASE SUBUNIT B EC_3.6.3.14 V ATPASE SUBUNIT VACUOLAR PROTON PUMP        | ENSG00000147416 |
| KIRREL3      | UBIQUITIN PHD AND RING FINGER DOMAIN CONTAINING 2 EC_6.3.2.- UBIQUITIN CONTAINING PHD AN | ENSG00000147854 |
| EVA1         | KIN OF IRRE PRECURSOR KIN OF IRREGULAR CHIASM NEPHRIN                                    | ENSG00000149571 |
| C12orf45     | 1 PRECURSOR                                                                              | ENSG00000149573 |
| PSTPIP2      | AMBIGUOUS                                                                                | ENSG00000151131 |
| TRIM11       | PROLINE SERINE THREONINE PHOSPHATASE INTERACTING                                         | ENSG00000152229 |
| DCK          | TRIPARTITE MOTIF CONTAINING                                                              | ENSG00000154370 |
| MRPL17       | KINASE                                                                                   | ENSG00000156136 |
| TMSL8        | ANKYRIN                                                                                  | ENSG00000157999 |
| HIST1H2BD    | 39S RIBOSOMAL L17 MITOCHONDRIAL PRECURSOR L17MT MRP L17                                  | ENSG00000158042 |
| HIST1H4H     | ADULT MALE TESTIS CDNA PRODUCT:THYMOSIN BETA HOMOLOG E11 GENE                            | ENSG00000158164 |
| MITD1        | HISTONE H2B                                                                              | ENSG00000158373 |
| EIF5B        | HISTONE H4                                                                               | ENSG00000158406 |
| C2orf29      | AMBIGUOUS                                                                                | ENSG00000158411 |
| PSMB4        | EUKARYOTIC TRANSLATION INITIATION FACTOR 5B EIF 5B TRANSLATION INITIATION FACTOR IF 2    | ENSG00000158417 |
| IRX6         | AMBIGUOUS                                                                                | ENSG00000158428 |
| CES7         | UNKNOWN                                                                                  | ENSG00000158435 |
| HK2          | AMBIGUOUS                                                                                | ENSG00000159374 |
| ASRGL1       | PROTEASOME SUBUNIT BETA TYPE 4 PRECURSOR EC_3.4.25.1 PROTEASOME BETA CHAIN MACROPAIN     | ENSG00000159377 |
| LRRC38       | IROQUOIS CLASS HOMEODOMAIN IRX IROQUOIS HOMEODOMAIN                                      | ENSG00000159387 |
| SNED1        | LIVER CARBOXYLESTERASE PRECURSOR EC_3.1.1.1                                              | ENSG00000159398 |
| REL          | HEXOKINASE EC_2.7.1.1                                                                    | ENSG00000159399 |
| PEX13        | COMPLEMENT SUBCOMPONENT PRECURSOR [CONTAINS: COMPLEMENT SUBCOMPONENT HEAVY CHAIN         | ENSG00000159403 |
| RFTN2        | THREONINE ASPARTASE 1 EC_3.4.25.- TASPASE 1 [CONTAINS: THREONINE ASPARTASE SUBUNIT ALP   | ENSG00000162174 |
| CAPN13       | LEUCINE RICH REPEAT CONTAINING                                                           | ENSG00000162494 |
| LRRTM1       | PRECURSOR                                                                                | ENSG00000162804 |
| C2orf47      | AMBIGUOUS                                                                                | ENSG00000162864 |
| ARL5A        | NUCLEAR FACTOR NF KAPPA B SUBUNIT                                                        | ENSG00000162924 |
| FABP1        | PEROXISOMAL MEMBRANE PEX13 PEROXIN 13                                                    | ENSG00000162928 |
| PPM1L        | RAFTLIN 2 RAFT LINKING 2                                                                 | ENSG00000162944 |
| SFMBT1       | CALPAIN SUBUNIT CALPAIN SUBUNIT CALCIUM ACTIVATED NEUTRAL PROTEINASE CANP                | ENSG00000162949 |
| CCDC112      | LEUCINE RICH REPEAT TRANSMEMBRANE NEURONAL PRECURSOR                                     | ENSG00000162951 |
| OXR1         | UNKNOWN                                                                                  | ENSG00000162972 |
| ATP5C1       | ADP RIBOSYLATION FACTOR                                                                  | ENSG00000162980 |
| CD300C       | FATTY ACID BINDING PROTEIN LIVER L FABP                                                  | ENSG00000163586 |
| DTYMK        | PHOSPHATASE 2C EC_3.1.3.16 PP2C                                                          | ENSG00000163590 |
| RAB24 / MXD3 | SCM WITH FOUR MBT DOMAINS                                                                | ENSG00000163935 |
| KLF13        | AMBIGUOUS                                                                                | ENSG00000164221 |
| PRDM10       | OXIDATION RESISTANCE 1                                                                   | ENSG00000164830 |
| GATM         | ATP SYNTHASE GAMMA CHAIN MITOCHONDRIAL PRECURSOR EC_3.6.3.14                             | ENSG00000165629 |
| HPSE2        | CMRF35 MOLECULE 1 PRECURSOR CLM 1 CD300 ANTIGEN FAMILY MEMBER F                          | ENSG00000167850 |
| GOLPH4       | THYMIDYLATE KINASE EC_2.7.4.9 DTMP KINASE                                                | ENSG00000168393 |
| GOLT1A       | RAS RELATED RAB                                                                          | ENSG00000169228 |
| INHBC        | KRUEPPEL FACTOR TRANSCRIPTION FACTOR BASIC TRANSCRIPTION ELEMENT BINDING BTE BINDING     | ENSG00000169926 |
| PLEKHF2      | LECTIN                                                                                   | ENSG00000170298 |
| OR4D11       | PR DOMAIN ZINC FINGER 10 PR DOMAIN CONTAINING 10                                         | ENSG00000170325 |
| FUT2         | GLYCINE AMIDINOTRANSFERASE MITOCHONDRIAL PRECURSOR EC_2.1.4.1 L ARGININE:GLYCINE AMIDINO | ENSG00000171766 |
| NFATC2IP     | LRP16                                                                                    | ENSG00000172264 |
| KIAA0195     | HEPARANASE PRECURSOR EC_3.2.- ENDO GLUCURONIDASE [CONTAINS: HEPARANASE 8 KDA SUBUN       | ENSG00000172987 |
| ASB8         | 130 GOLGI LOCALIZED PHOSPHOPROTEIN                                                       | ENSG00000173905 |
| MPI          | VESICLE TRANSPORT GOLGI TRANSPORT 1 HOMOLOG                                              | ENSG00000174567 |
| C9orf50      | INHIBIN BETA CHAIN PRECURSOR ACTIVIN BETA CHAIN                                          | ENSG00000175189 |
| RRH          | PLECKSTRIN HOMOLOGY DOMAIN CONTAINING FAMILY F MEMBER PH DOMAIN CONTAINING FAMILY F ME   | ENSG00000175895 |
| TMEM64       | OLFACTORY RECEPTOR                                                                       | ENSG00000176200 |
| BHLHB5       | GALACTOSIDE 2 ALPHA L FUCOSYLTRANSFERASE 1 EC_2.4.1.69 GDP L FUCOSE: BETA D GALACTOSIDE  | ENSG00000176920 |
| TDRKH        | FACTOR OF ACTIVATED T CELLS CYTOPLASMIC 2 INTERACTING                                    | ENSG00000176953 |
| AFMID        | TRANSMEMBRANE 94                                                                         | ENSG00000177728 |
| OR2T11       | RNA POLYMERASE II TRANSCRIPTIONAL COACTIVATOR                                            | ENSG00000177907 |
| GSTT1        | ANKYRIN REPEAT AND SOCS BOX 8 ASB 8                                                      | ENSG00000177981 |
| LCN12        | MANNANOSE 6 PHOSPHATE ISOMERASE EC_5.3.1.8 PHOSPHOMANNOSE ISOMERASE PMI PHOSPHOHEXOMUT   | ENSG00000178802 |
| C9orf18      | AMBIGUOUS                                                                                | ENSG00000179058 |
| OR4C46       | OLFACTORY RECEPTOR                                                                       | ENSG00000180144 |
| MYT1L        | OPSN                                                                                     | ENSG00000180245 |
| COX19        | UNKNOWN                                                                                  | ENSG00000180694 |
| PNRC2        | OLIGODENDROCYTE TRANSCRIPTION FACTOR                                                     | ENSG00000180828 |
| C8orf76      | TUDOR AND KH DOMAIN CONTAINING                                                           | ENSG00000182134 |
| CCDC16       | PROBABLE ARYLFORMAMIDASE EC_3.5.1.9 KYNURENINE FORMAMIDASE KF                            | ENSG00000183077 |
| OR5D13       | OLFACTORY RECEPTOR OLFACTORY RECEPTOR OR1                                                | ENSG00000183130 |
| SP5          | UNCHARACTERIZED                                                                          | ENSG00000183260 |
| OR6C1        | GLUTATHIONE S TRANSFERASE THETA EC_2.5.1.18 GST CLASS THETA                              | ENSG00000184674 |
|              | EPIDIDYMAL SPECIFIC LIPOCALIN 12 PRECURSOR                                               | ENSG00000184925 |
|              | AMBIGUOUS                                                                                | ENSG00000185681 |
|              | OLFACTORY RECEPTOR OLFACTORY RECEPTOR OR11                                               | ENSG00000185926 |
|              | 60S RIBOSOMAL                                                                            | ENSG00000186239 |
|              | MYELIN TRANSCRIPTION FACTOR 1                                                            | ENSG00000186487 |
|              | AMBIGUOUS                                                                                | ENSG00000186871 |
|              | 14 DAYS EMBRYO LIVER CDNA PRODUCT: FRAGMENT                                              | ENSG00000187867 |
|              | CYTOCHROME C OXIDASE ASSEMBLY COX19                                                      | ENSG00000189201 |
|              | PROLINE RICH NUCLEAR RECEPTOR COACTIVATOR 2                                              | ENSG00000189266 |
|              | UNCHARACTERIZED                                                                          | ENSG00000189376 |
|              | UNKNOWN                                                                                  | ENSG00000197980 |
|              | COILED COIL DOMAIN CONTAINING 16                                                         | ENSG00000198783 |
|              | OLFACTORY RECEPTOR                                                                       | ENSG00000198877 |
|              | TRANSCRIPTION FACTOR                                                                     | ENSG00000204335 |
|              | AMBIGUOUS                                                                                | ENSG00000204676 |
|              | TESTIS EXPRESSED 101 PRECURSOR LIPID RAFT ASSOCIATED GLYCOPROTEIN TEC 21                 | ENSG00000204933 |
|              | OLFACTORY RECEPTOR                                                                       | ENSG00000205330 |
|              | UNKNOWN                                                                                  | ENSG00000205765 |
