# Supplementary material for: Quantification of ortholog losses in insects and vertebrates
Source: PubMed Central journal article supplement (PMC2258195; doi:10.1186/gb-2007-8-11-r242), 2007-11-16
Supplement: gb-2007-8-11-r242-S6.pdf [file gb-2007-8-11-r242-S6.pdf]

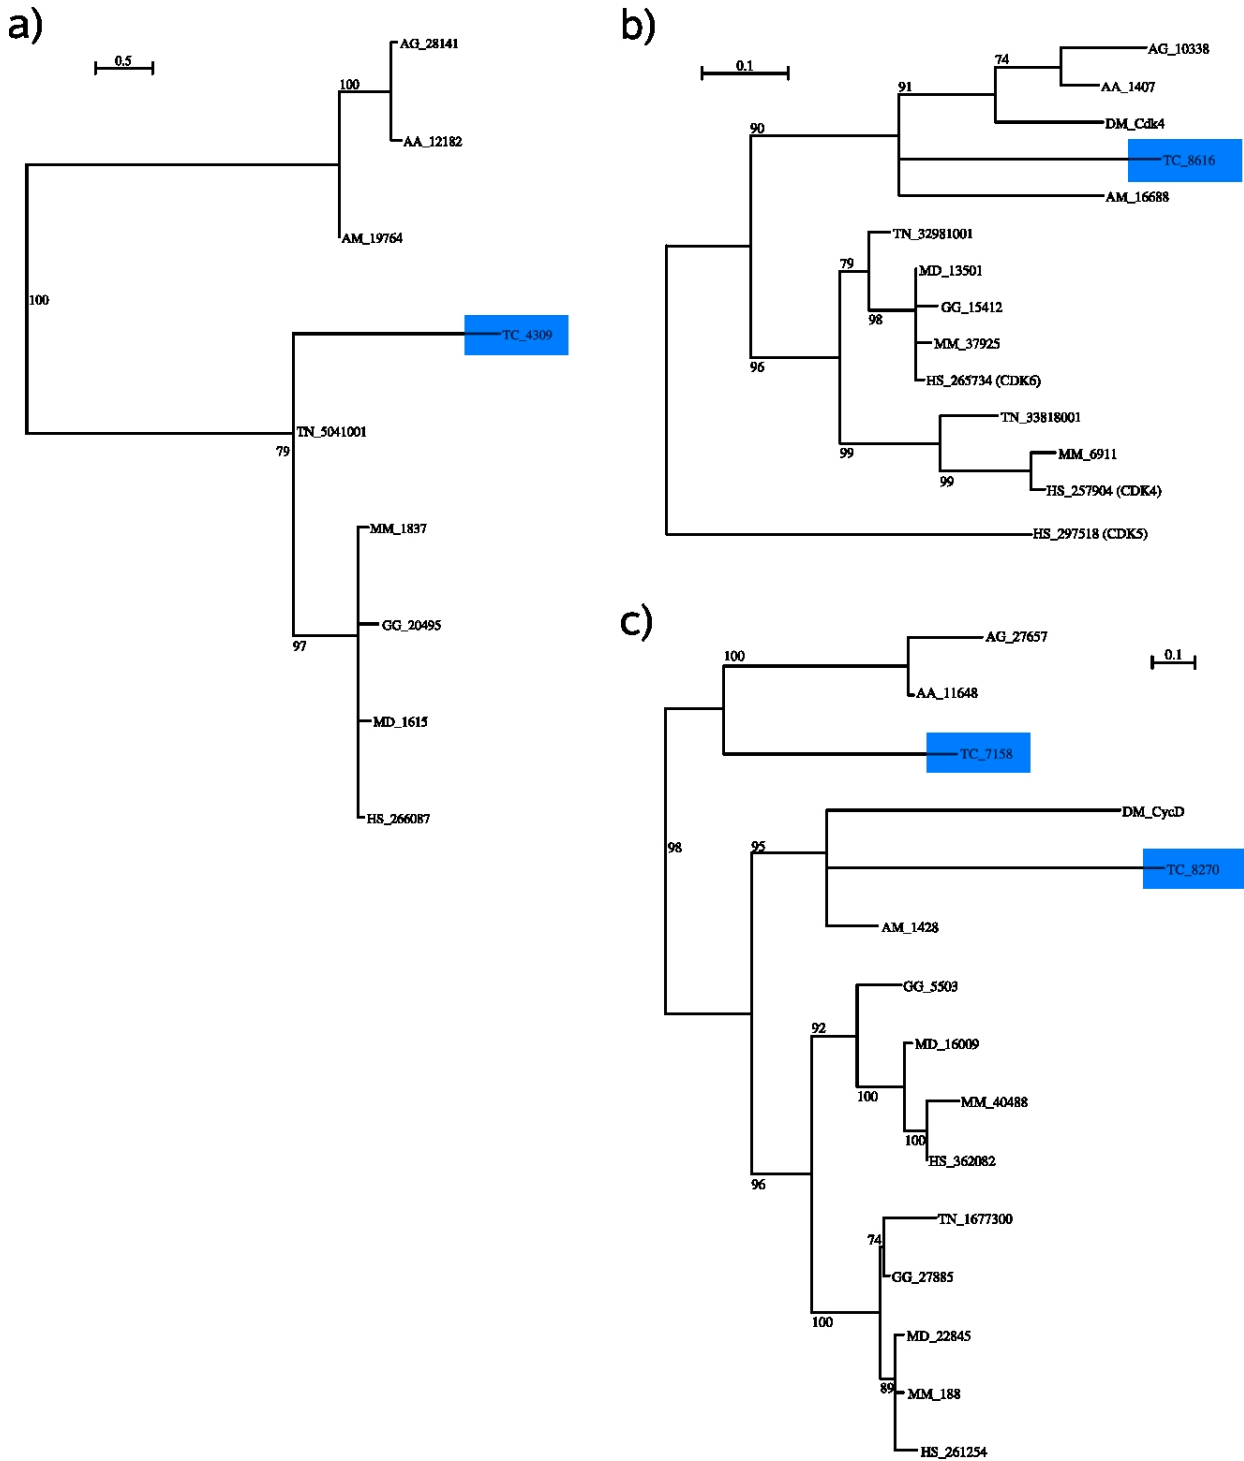

Additional data file 6. Phylogenetic analysis of Fbox7 (a), cdk4 (b) and cyclin D (c). Maximum-likelihood trees were calculated using phylml. Branchings with less than 70% bootstrap support (100 bootstraps) were collapsed. Tribolium proteins are underlined in blue. (a) Fbox7 is divergent in diptera and missing from Drosophila, whereas the Tribolium ortholog is vertebrate-like. The closest blast hit of human Fbx07 to Drosophila is Pi4KIIalpha (CG2929) which is the Drosophila ortholog of phosphatidylinositol 4-kinase type II (PI4K2B). Interestingly, there is no obvious Fbx07 ortholog in Ciona or c. elegans.
